# Supplementary material
Source: HighWire-hosted journal article supplement (https://bjsm.bmj.com/content/57/15/997)
Supplement: inline-supplementary-material-1 [file inline-supplementary-material-1.pdf]

## **Comparative effectiveness of different types of exercise reducing arterial stiffness in children and adolescents**

### **Supplementary material**

**Table S1.** Characteristics of the included studies

| Reference                      | Country       | Study design             | Sample                             |                              |                      | Intervention          |                                                                                                                                                                                |             | Outcome                     |                              |
|--------------------------------|---------------|--------------------------|------------------------------------|------------------------------|----------------------|-----------------------|--------------------------------------------------------------------------------------------------------------------------------------------------------------------------------|-------------|-----------------------------|------------------------------|
|                                |               |                          | Sample size (%women)               | Age (years)                  | Type of population   | Type of exercise      | Intervention characteristics                                                                                                                                                   | Type of PWV | Measuring device            | Basal values (m/s)           |
| <b>Bharath et al. 2018</b>     | United States | RCT                      | IG = 20 (100%)<br>CG = 20 (100%)   | IG: 14.8±1<br>CG: 14.6±1     | Obese adolescents    | Combined exercise     | IG: Resistance training + 30' treadmill walking <ul style="list-style-type: none"> <li>• 60 min</li> <li>• 5 times/wk</li> <li>• 12 weeks</li> </ul>                           | baPWV       | Tonometry SphygmoCor        | IG: 8.5±1.2<br>CG: 8.3±1     |
| <b>Bruyndonckx et al. 2015</b> | Belgium       | Quasi experimental study | IG = 33 (72.7%)<br>CG = 28 (78.5%) | IG: 15.4±1.5<br>CG: 15.1±1.2 | Obese adolescents    | Combined exercise     | IG: Resistance training + aerobic exercise (running, cycling or swimming) <ul style="list-style-type: none"> <li>• 40 min</li> <li>• 3 times/wk</li> <li>• 40 weeks</li> </ul> | aPWV        | Oscillometric Arteriograph  | IG: 5.9±0.4<br>CG: 6.1±0.5   |
| <b>Chuensiri et al. 2017</b>   | Thailand      | RCT                      | IG = 16 (0%)<br>CG = 16 (0%)       | IG: 11.0±0.3<br>CG: 10.6±0.3 | Obese children       | HIIT                  | IG: Cycling at 90% of peak power output <ul style="list-style-type: none"> <li>• 8 sets of 2' – 1' rest</li> <li>• 3 times/wk</li> <li>• 12 weeks</li> </ul>                   | baPWV       | Oscillometric VP-1000plus   | IG: 10.0±0.3<br>CG: 10.0±0.4 |
| <b>Davis et al. 2019</b>       | United States | RCT                      | IG = 90 (67%)<br>CG = 85 (55%)     | IG: 9.6±0.2<br>CG: 9.7±0.2   | Overweight children  | Aerobic exercise      | IG: Instructor-led aerobic exercise <ul style="list-style-type: none"> <li>• 40 min</li> <li>• 5 times/wk</li> <li>• 32 weeks</li> </ul>                                       | cfPWV       | Tonometry SphygmoCor        | IG: 5.1±0.2<br>CG: 5.1±0.1   |
| <b>Hacke et al. 2017</b>       | Germany       | RCT                      | IG = 92 (54.3%)<br>CG = 43 (49.8%) | IG: 4.7±0.2<br>CG: 5.1±0.3   | Healthy preschoolers | Sensorymotor training | IG: Psychomotor play and functional gymnastics <ul style="list-style-type: none"> <li>• 60 min</li> <li>• 2 times/wk</li> <li>• 24 weeks</li> </ul>                            | aPWV        | Oscillometric Mobil-O-Graph | IG: 4.3±0.3<br>CG: 4.3±0.2   |

|                             |               |     |                                                              |                                                          |                   |                                                                                            |                                                                                                                                                                                                                                                                |       |                                  |                                                          |
|-----------------------------|---------------|-----|--------------------------------------------------------------|----------------------------------------------------------|-------------------|--------------------------------------------------------------------------------------------|----------------------------------------------------------------------------------------------------------------------------------------------------------------------------------------------------------------------------------------------------------------|-------|----------------------------------|----------------------------------------------------------|
| <b>Horner et al. 2015</b>   | United States | RCT | IG1 = 30<br>(50)<br>IG2 = 27<br>(51.8)<br>CG = 24<br>(50)    | IG1:<br>14.7±1.8<br>IG2:<br>14.6±1.9<br>CG:<br>14.9±1.8  | Obese adolescents | IG1: Aerobic<br>exercise<br>IG2:<br>Resistance<br>training                                 | IG1: Moderate<br>intensity exercise on<br>a treadmill,<br>elliptical or<br>stationary bike<br>• 60 min<br>• 3 times/wk<br>• 24 weeks<br>IG2: Series of 10<br>whole body<br>exercises (2 sets of<br>8–12 repetitions)<br>• 60 min<br>• 2 times/wk<br>• 24 weeks | aPWV  | Piezoelectric<br>Complior system | IG1:<br>6.5±1.4<br>IG2:<br>6.6±1.7<br>CG:<br>6.4±1.6     |
| <b>Ketelhut et al. 2020</b> | Germany       | RCT | IG = 22<br>(50%)<br>CG = 24<br>(41.6%)                       | IG:<br>10.8±0.6<br>CG:<br>10.7±0.7                       | Healthy children  | HIIT                                                                                       | IG: Instructor-led<br>HIIT<br>• 20 min<br>• 3 times/wk<br>• 12 weeks                                                                                                                                                                                           | aPWV  | Oscillometric<br>Mobil-O-Graph   | IG:<br>4.8±0.3<br>CG:<br>4.4±0.3                         |
| <b>Ketelhut et al. 2021</b> | Germany       | RCT | IG = 51<br>(64.7%)<br>CG = 54<br>(46.3%)                     | IG:<br>8.1±0.6<br>CG:<br>8.3±0.6                         | Healthy children  | HIIT                                                                                       | IG: Instructor-led<br>HIIT<br>• 45 min<br>• 2 times/wk<br>• 36 weeks                                                                                                                                                                                           | aPWV  | Oscillometric<br>Mobil-O-Graph   | IG:<br>4.8±0.3<br>CG:<br>4.6±0.3                         |
| <b>Lee et al. 2020</b>      | United States | RCT | IG1 = 38<br>(66.8)<br>IG2 = 40<br>(62.5)<br>IG3 = 40<br>(65) | IG1:<br>14.4±1.6<br>IG2:<br>14.4±1.6<br>IG3:<br>14.5±1.7 | Obese adolescents | IG1: Aerobic<br>exercise<br>IG2:<br>Resistance<br>training<br>IG3:<br>Combined<br>exercise | IG1: Progressive<br>aerobic exercise<br>(treadmills and/or<br>ellipticals)<br>IG2: whole-body<br>resistance exercises<br>IG3: 30' aerobic<br>exercise+<br>30'whole-body<br>resistance exercises<br><br>• 60 min<br>• 3 times/wk                                | cfPWV | Piezoelectric<br>Complior system | IG1:<br>5.96±0.7<br>IG2:<br>5.84±0.9<br>IG3:<br>5.99±0.9 |

|                              |                |     |                                    |                              |                                   |                       |                                                                                              |       |                             |                            |
|------------------------------|----------------|-----|------------------------------------|------------------------------|-----------------------------------|-----------------------|----------------------------------------------------------------------------------------------|-------|-----------------------------|----------------------------|
| <b>McNarry et al. 2020</b>   | United Kingdom | RCT | IG = 16 (40.7%)<br>CG = 16 (39.4%) | 13.6±0.9                     | Healthy adolescents               | HIIT                  | IG: Instructor-led HIIT<br>• 24 weeks<br>• 20 min<br>• 3 times/wk<br>• 12 weeks              | cfPWV | Oscillometric Vicorder      | IG: 5.7±0.7<br>CG: 5.4±0.5 |
| <b>Minghetti et al. 2022</b> | Switzerland    | RCT | IG = 46 (50%)<br>CG = 22 (54.5%)   | IG: 5.2±0.6<br>CG: 5.4±0.5   | Healthy preschoolers              | Sensorymotor training | IG: Gross motor skills and locomotor exercises<br>• 45 min<br>• 1 times/wk<br>• 25 weeks     | aPWV  | Oscillometric Mobil-O-Graph | IG: 4.2±0.4<br>CG: 4.3±0.4 |
| <b>Son et al. 2017</b>       | South Korea    | RCT | IG = 20 (100%)<br>CG = 20 (100%)   | IG: 15.0±1.0<br>CG: 15.0±1.0 | Obese prehypertensive adolescents | Combined exercise     | IG: Resistance exercise + badminton training<br>• 60 min<br>• 3 times/wk<br>• 12 weeks       | baPWV | Tonometry SphygmoCor        | IG: 8.2±0.8<br>CG: 7.9±0.3 |
| <b>Sung et al. 2019</b>      | South Korea    | RCT | IG = 20 (100%)<br>CG = 20 (100%)   | IG: 15.0±1.0<br>CG: 15.0±1.0 | Prehypertensive adolescents       | Aerobic exercise      | IG: Aerobic exercise (jumping rope)<br>• 50 min<br>• 5 times/w<br>• 12 weeks                 | baPWV | Tonometry SphygmoCor        | IG: 8.2±1.0<br>CG: 8.2±0.5 |
| <b>Wong et al. 2018</b>      | United States  | RCT | IG = 15 (100%)<br>CG = 15 (100%)   | IG: 15.2±1.2<br>CG: 15.3±1.1 | Obese adolescents                 | Combined exercise     | IG: 20' resistance training + 30' treadmill walking<br>• 60 min<br>• 3 times/w<br>• 12 weeks | baPWV | Tonometry SphygmoCor        | IG: 8.4±0.8<br>CG: 8.5±0.7 |

**Table S2.** Search strategy for MEDLINE**MEDLINE (via Pubmed)**

((“cardiovascular disease” OR “cardiovascular risk” OR “arterial stiffness” OR “pulse wave velocity” OR “PWV”) AND (“physical activity” OR “physical exercise” OR “exercise” OR “training” OR “HIIT” OR “interval training” OR “intermittent exercise” OR “continuous exercise” OR “aerobic exercise” OR “endurance training” OR “resistance exercise” OR “strength” OR “stretching” OR “mind–body exercises” OR “Pilates” OR “yoga” OR “Tai Chi” OR sport) AND (child\* OR pediatric OR infan\* OR kids OR young OR adolescents OR teen\*) AND (effectiveness OR “clinical trial” OR trials OR “controlled trial” OR random\* OR “clinical trials”))

**Results: 614**

**Table S3.** CINeMA confidence rating

| Comparison | Number of studies | Within-study bias | Reporting bias | Indirectness  | Imprecision    | Heterogeneity  | Incoherence | Confidence rating |
|------------|-------------------|-------------------|----------------|---------------|----------------|----------------|-------------|-------------------|
| aer:comb   | 1                 | No concerns       | Some concerns  | Some concerns | No concerns    | Some concerns  | No concerns | High              |
| aer:con    | 3                 | Some concerns     | Some concerns  | Some concerns | No concerns    | Some concerns  | No concerns | High              |
| aer:res    | 2                 | Some concerns     | Some concerns  | Some concerns | Some concerns  | Some concerns  | No concerns | Moderate          |
| comb:con   | 4                 | Some concerns     | Some concerns  | Some concerns | Some concerns  | Some concerns  | No concerns | Moderate          |
| comb:res   | 1                 | No concerns       | Some concerns  | Some concerns | Some concerns  | Some concerns  | No concerns | High              |
| con:hit    | 4                 | Some concerns     | Some concerns  | No concerns   | No concerns    | Major concerns | No concerns | Low               |
| con:res    | 1                 | Some concerns     | Some concerns  | Some concerns | Some concerns  | Some concerns  | No concerns | Moderate          |
| con:sen    | 2                 | Some concerns     | Some concerns  | No concerns   | Major concerns | No concerns    | No concerns | Low               |
| aer:hit    | 0                 | Some concerns     | Some concerns  | Some concerns | Some concerns  | Some concerns  | No concerns | Moderate          |
| aer:sen    | 0                 | Some concerns     | Some concerns  | No concerns   | No concerns    | Some concerns  | No concerns | High              |
| comb:hit   | 0                 | Some concerns     | Some concerns  | Some concerns | Some concerns  | Some concerns  | No concerns | Moderate          |
| comb:sen   | 0                 | Some concerns     | Some concerns  | Some concerns | Some concerns  | Some concerns  | No concerns | Moderate          |
| hit:res    | 0                 | Some concerns     | Some concerns  | Some concerns | Major concerns | No concerns    | No concerns | Low               |
| hit:sen    | 0                 | Some concerns     | Some concerns  | No concerns   | Some concerns  | Some concerns  | No concerns | High              |
| res:sen    | 0                 | Some concerns     | Some concerns  | Some concerns | Some concerns  | Some concerns  | No concerns | Moderate          |

**Table S4.** Pooled SMD on types of PE. Upper right triangle gives the pooled mean differences from pairwise comparisons, lower left triangle pooled mean differences from the network meta-analysis (row intervention relative to column).

|                      |                     |                      |                     |                       |                      |
|----------------------|---------------------|----------------------|---------------------|-----------------------|----------------------|
| Aerobic exercise     | -1.36 (-3.08; 0.36) | NA                   | -0.94 (-2.16; 0.29) | NA                    | -1.92 (-2.95; -0.89) |
| -1.34 (-2.41; -0.28) | Combined            | NA                   | 1.00 (-0.71; 2.71)  | NA                    | -0.68 (-1.58; 0.21)  |
| -0.82 (-2.10; 0.46)  | 0.52 (-0.69; 1.73)  | HIIT                 | NA                  | NA                    | -1.11 (-2.01; -0.21) |
| -0.85 (-2.00; 0.30)  | 0.49 (-0.76; 1.74)  | -0.03 (-1.53; 1.46)  | Resistance training | NA                    | -0.73 (-2.50; 1.04)  |
| -2.04 (-3.55; -0.53) | -0.70 (-2.15; 0.75) | -1.22 (-2.73; 0.29)  | -1.19 (-2.88; 0.51) | Sensorymotor training | 0.11 (-1.10; 1.32)   |
| -1.93 (-2.84; -1.02) | -0.59 (-1.39; 0.22) | -1.11 (-2.01; -0.21) | -1.08 (-2.27; 0.11) | 0.11 (-1.10; 1.32)    | Control              |

**Table S5.** Analysis of the distribution of outcomes according to mean, standard deviation (SD) and Mean/SD ratio

| Reference                      | Type of exercise (a) | Type of exercise (b) | Sample size (n) | Mean (a) | SD (a) | Mean/SD ratio (a) | Mean (b) | SD (b) | Mean/SD ratio (b) |
|--------------------------------|----------------------|----------------------|-----------------|----------|--------|-------------------|----------|--------|-------------------|
| <b>Bharath et al. 2018</b>     | Combined             | Control              | 20              | 8.5      | 1.2    | 7.1               | 8.3      | 1.0    | 8.3               |
| <b>Bruyndonckx et al. 2015</b> | Combined             | Control              | 48              | 5.9      | 1.87   | 3.2               | 6.1      | 2.1    | 2.9               |
| <b>Chuensiri et al. 2017</b>   | HIIT                 | Control              | 22              | 997.9    | 28.16  | 35.4              | 1004.0   | 40.1   | 25.0              |
| <b>Davis et al. 2019</b>       | Aerobic              | Control              | 175             | 5.1      | 1.0    | 5.3               | 5.1      | 0.7    | 7.2               |
| <b>Hacke et al. 2017</b>       | Sensorymotor         | Control              | 135             | 4.3      | 0.3    | 14.3              | 4.3      | 0.2    | 21.5              |
| <b>Horner et al. 2015</b>      | Aerobic              | Control              | 43              | 646.8    | 138.1  | 4.7               | 644.4    | 154.8  | 4.2               |
| <b>Horner et al. 2015 (2)</b>  | Resistance           | Control              | 39              | 659.8    | 170.8  | 3.9               | 644.4    | 154.8  | 4.2               |
| <b>Ketelhut et al. 2020</b>    | HIIT                 | Control              | 105             | 4.8      | 0.3    | 16.0              | 4.6      | 0.3    | 15.3              |
| <b>Ketelhut et al. 2021</b>    | HIIT                 | Control              | 46              | 4.8      | 0.3    | 16.0              | 4.4      | 0.3    | 14.7              |
| <b>Lee et al. 2020</b>         | Aerobic              | Combined             | 74              | 596.8    | 75.3   | 7.9               | 599.3    | 94.1   | 6.4               |
| <b>Lee et al. 2020 (2)</b>     | Resistance           | Combined             | 78              | 584.2    | 93     | 6.3               | 599.3    | 94.1   | 6.4               |
| <b>McNarry et al. 2020</b>     | HIIT                 | Control              | 32              | 5.6      | 0.6    | 9.3               | 5.5      | 0.5    | 11.0              |
| <b>Minghetti et al. 2022</b>   | Sensorymotor         | Control              | 68              | 4.2      | 0.4    | 10.5              | 43       | 0.4    | 107.5             |
| <b>Son et al. 2017</b>         | Combined             | Control              | 40              | 8.2      | 1.6    | 5.3               | 8.0      | 1.3    | 6.1               |
| <b>Sung et al. 2019</b>        | Aerobic              | Control              | 40              | 8.2      | 1      | 8.2               | 8.2      | 0.5    | 16.4              |
| <b>Wong et al. 208</b>         | Combined             | Control              | 30              | 8.4      | 3.1    | 2.7               | 8.5      | 2.7    | 3.1               |

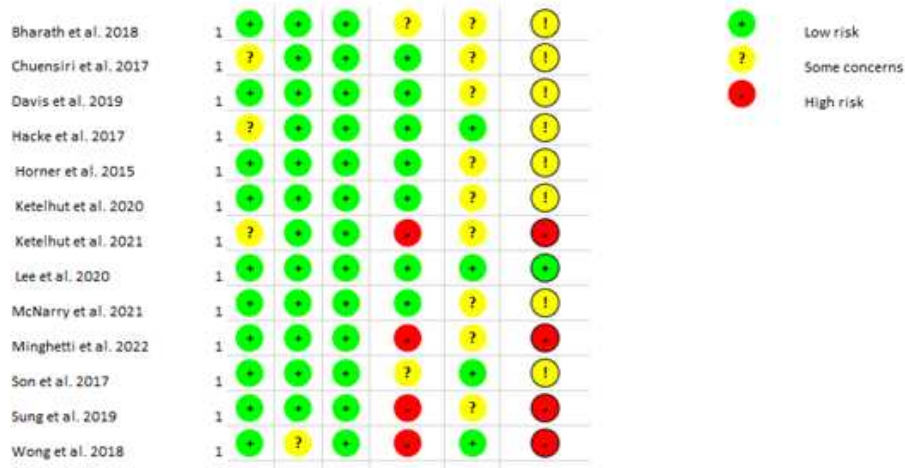

Figure S1. Quality assessment

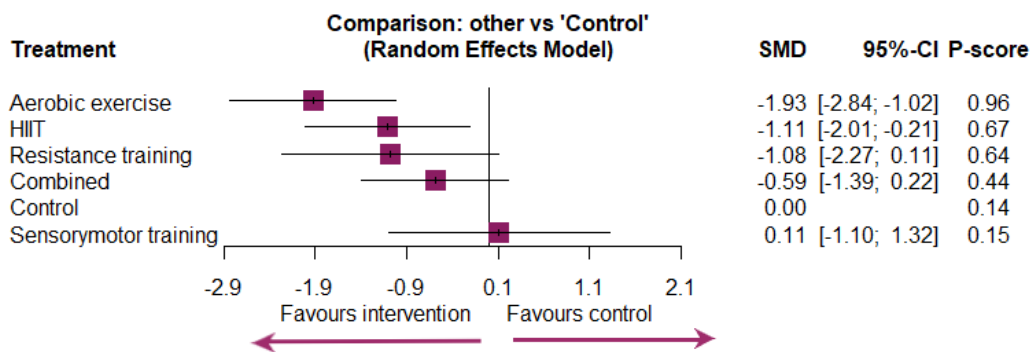

Figure S2. Forest plot of the pooled effect of each modality of exercise compared to the control group



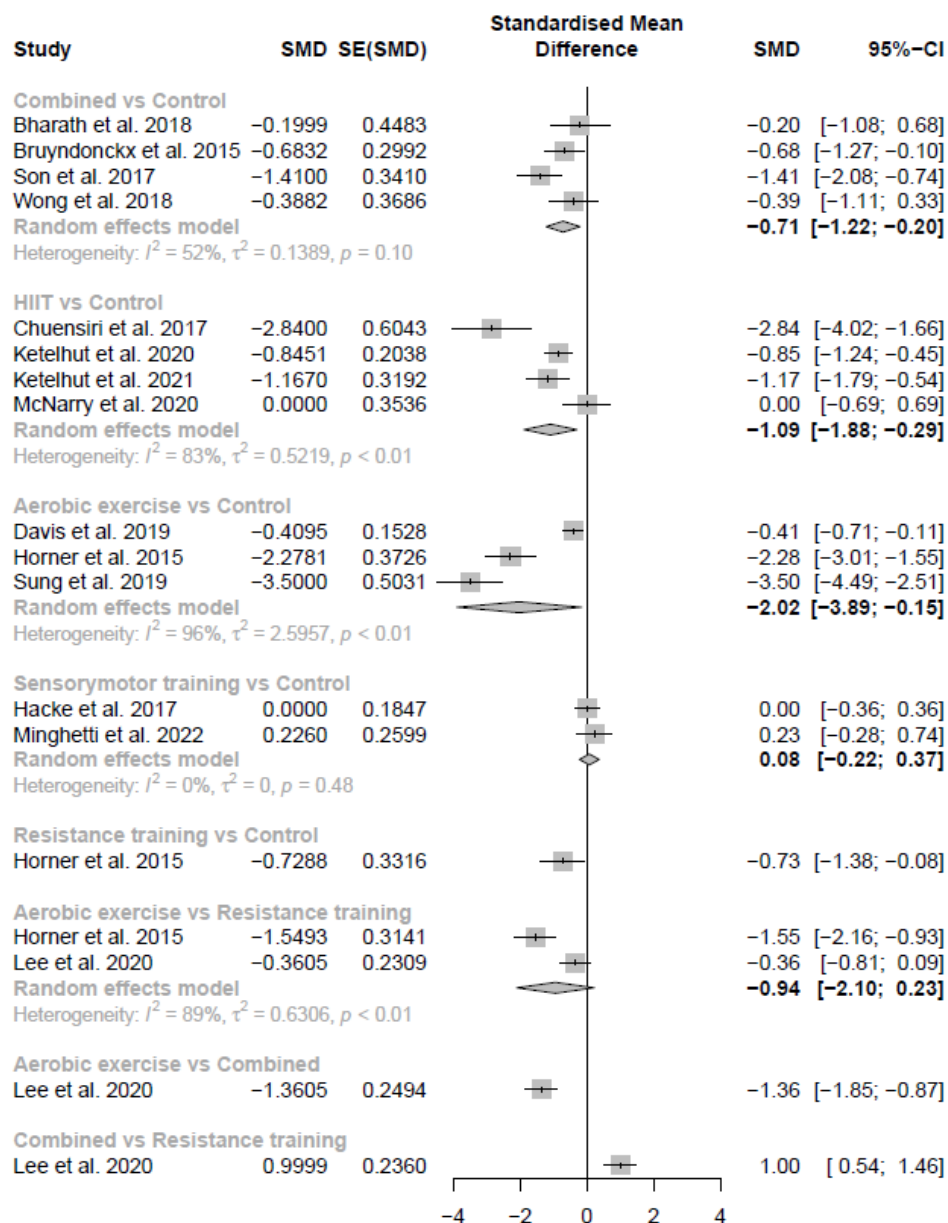

**Figure S3.** Pairwise comparisons (only comparisons with direct evidence are shown).

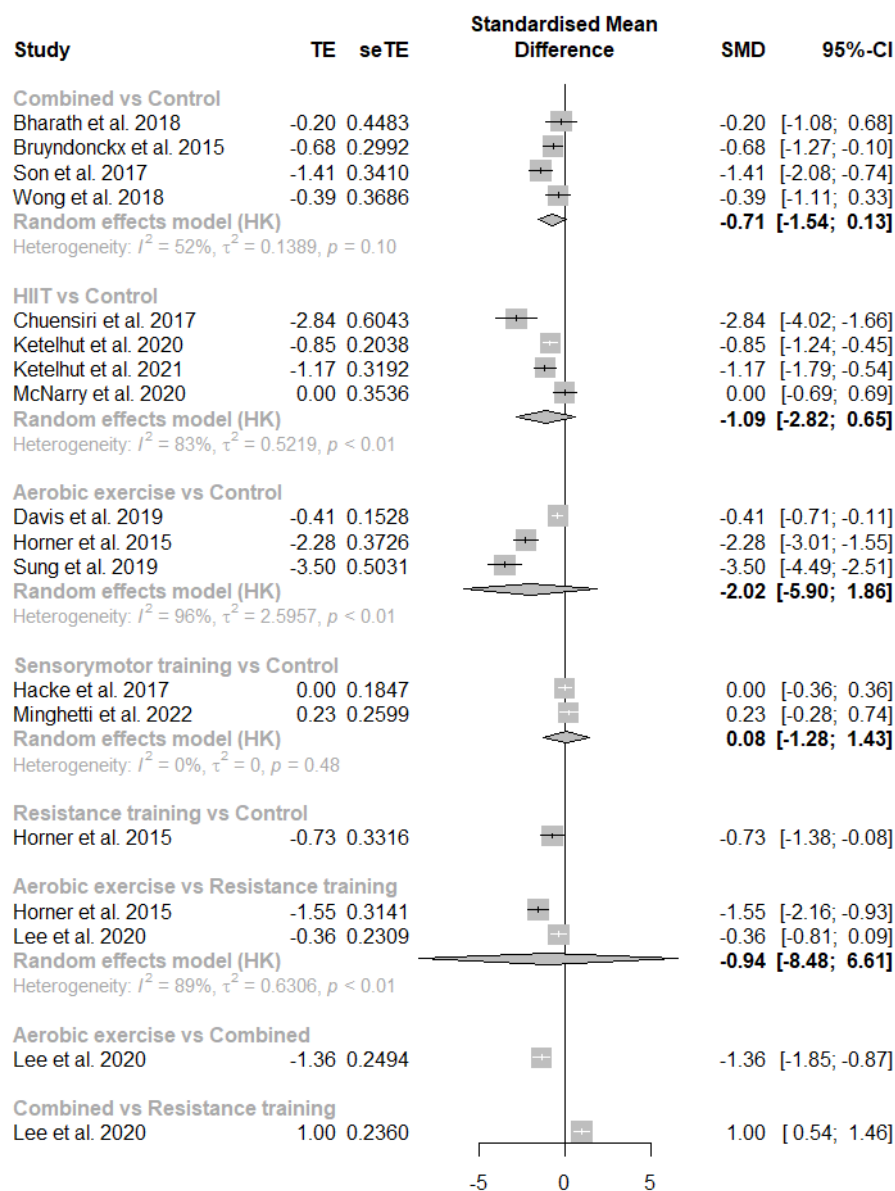

**Figure S4.** Pairwise comparisons using Hartung-Knapp-Sidik-Jonkman random effects method (only comparisons with direct evidence are shown).

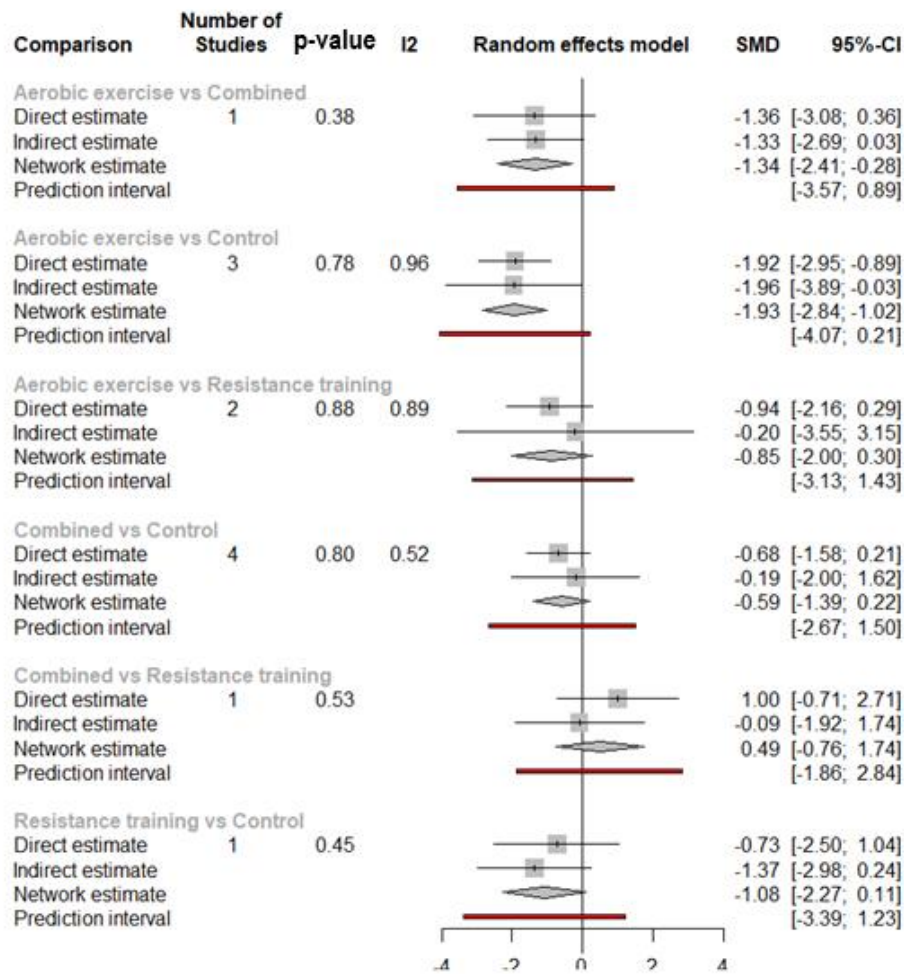

Figure S5. Node-splitting

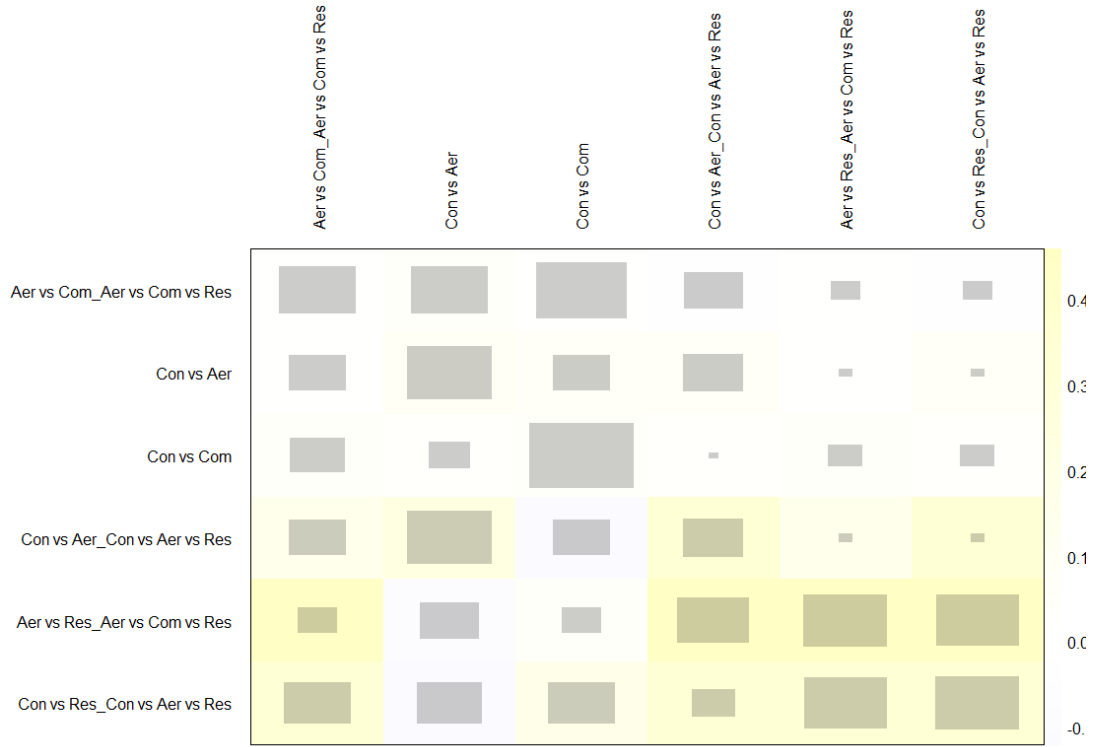

Figure S6. Heatplot.

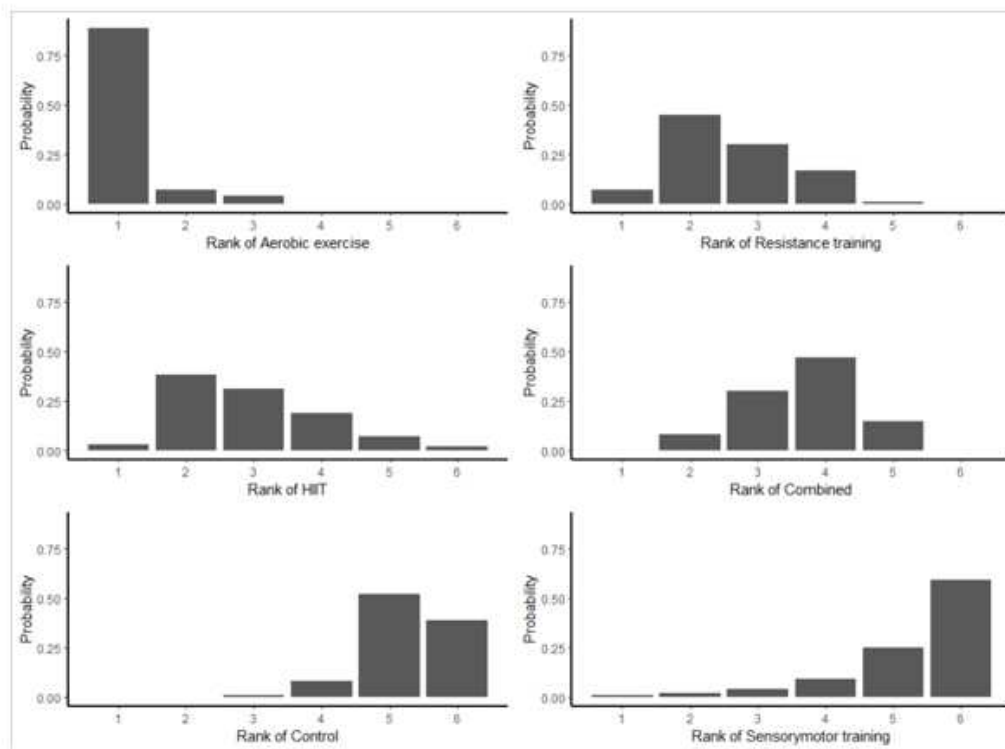

### Cumulative ranking probabilities

|                               | <i>1</i> | <i>2</i> | <i>3</i> | <i>4</i> | <i>5</i> | <i>6</i> |
|-------------------------------|----------|----------|----------|----------|----------|----------|
| <i>Aerobic exercise</i>       | 0.9      | 1.0      | 1.0      | 1.0      | 1.0      | 1.0      |
| <i>Combined</i>               | 0.0      | 0.1      | 0.4      | 0.9      | 1.0      | 1.0      |
| <i>HIIT</i>                   | 0.0      | 0.4      | 0.7      | 0.9      | 0.1      | 1.0      |
| <i>Resistance training</i>    | 0.1      | 0.5      | 0.8      | 0.1      | 1.0      | 1.0      |
| <i>Sensory motor training</i> | 0.0      | 0.0      | 0.1      | 0.2      | 0.4      | 1.0      |
| <i>Control</i>                | 0.0      | 0.0      | 0.0      | 0.1      | 0.6      | 1.0      |

**Figure S7.** Rankogram for each intervention of physical exercise.

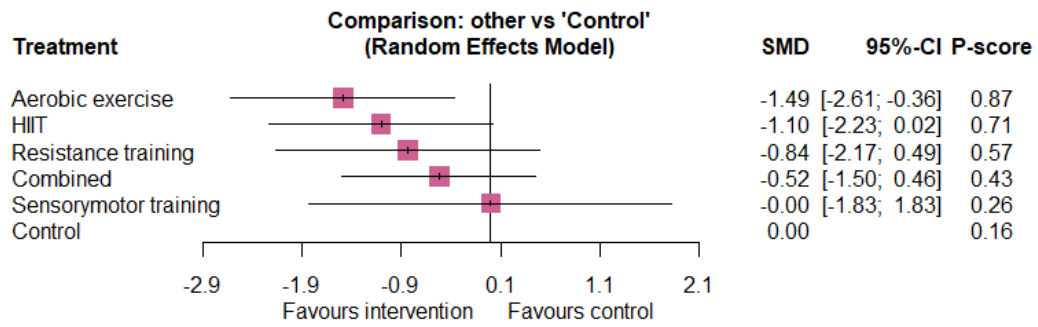

**Figure S8.** Forest plot of the pooled effect of each modality of exercise compared to the control group without high risk of bias studies

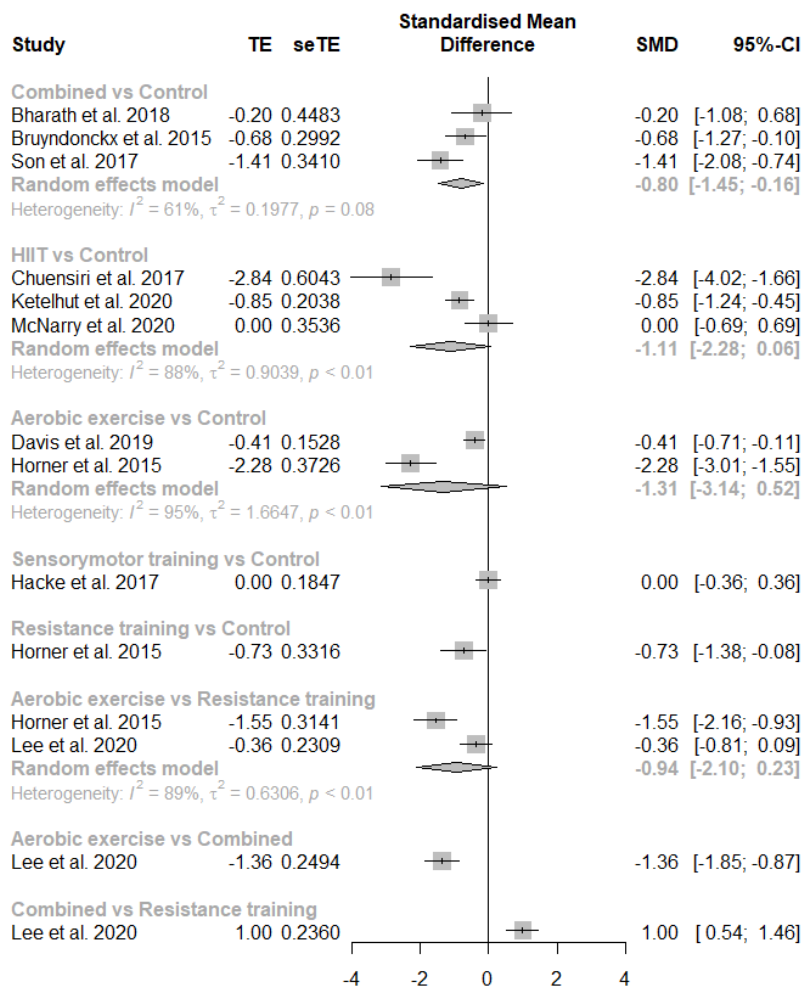

**Figure S9.** Pairwise comparisons without high risk of bias studies

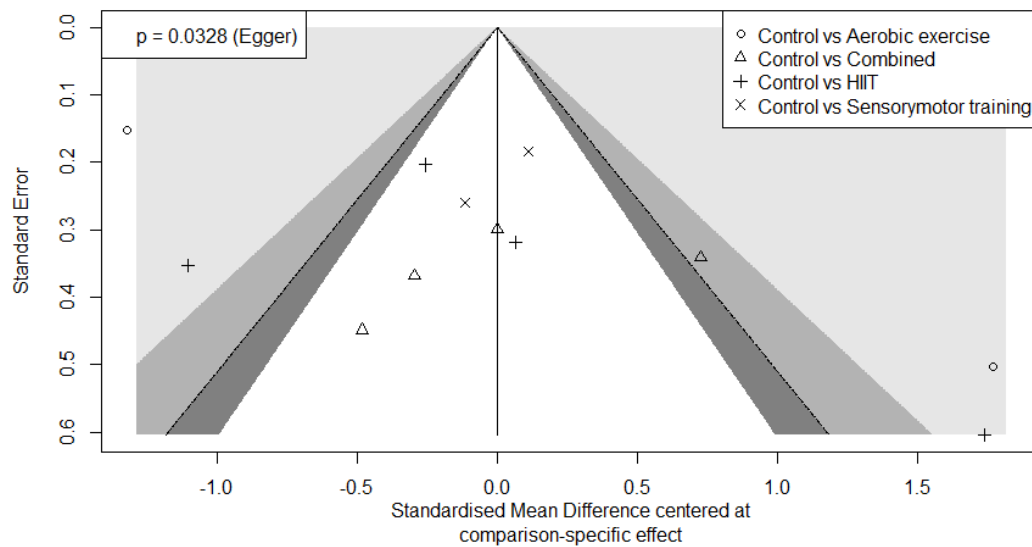

**Figure S10.** Contour-enhanced funnel plot for pooled mean differences.

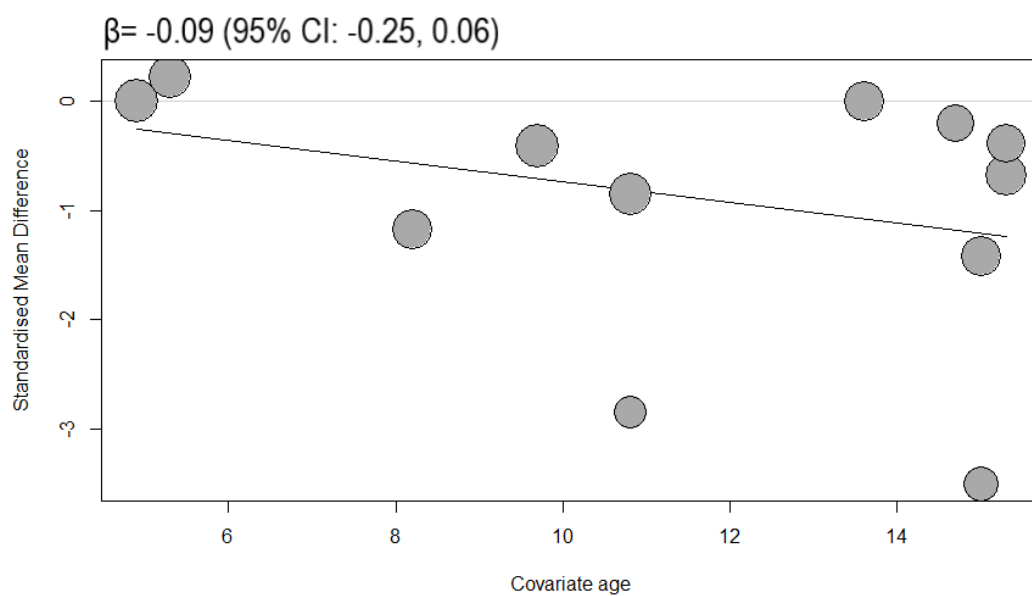

**Figure S11.** Meta-regression by mean age of participants



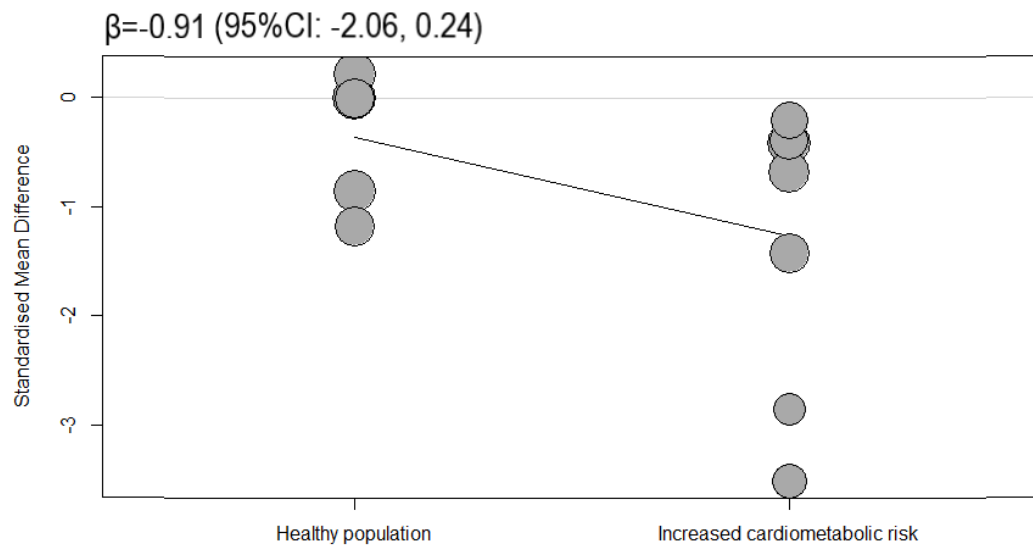

**Figure S12.** Meta-regression by type of population.

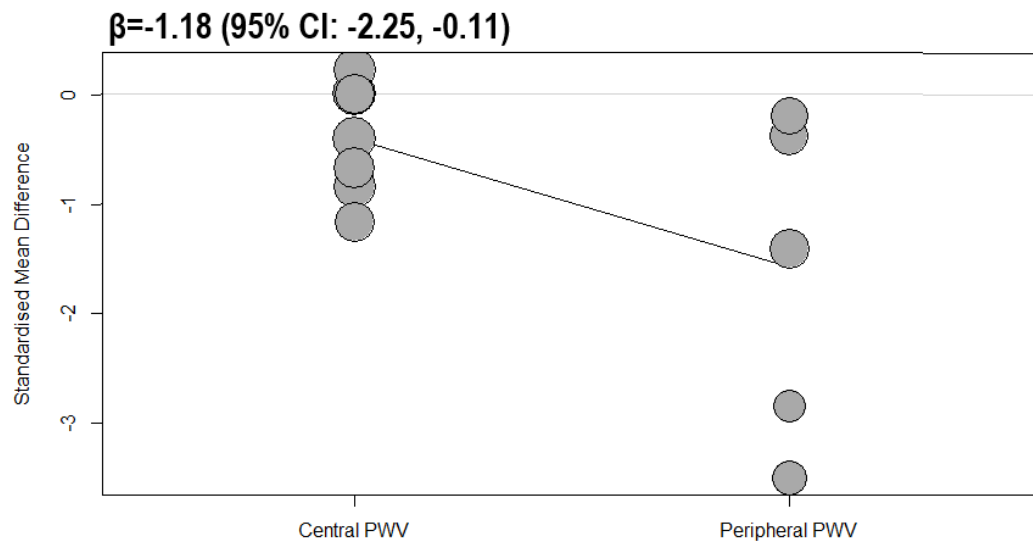

**Figure S13.** Meta-regression by type of PWV measurement

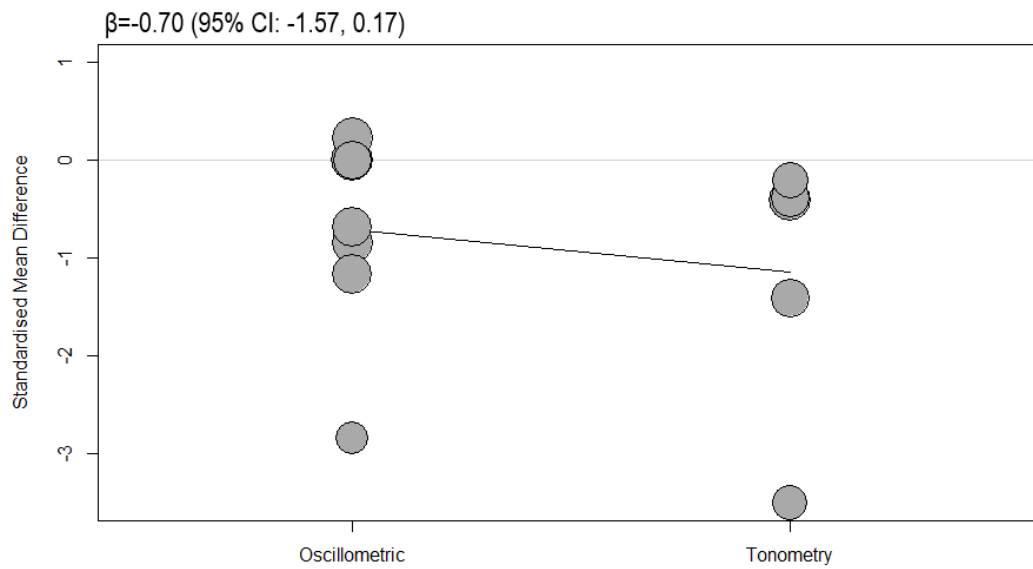

**Figure S14.** Meta-regression by type of PWV measurement method
